# Supplementary material for: New Photoresponsive Poly(meth)acrylates Bearing Azobenzene Moieties Obtained via ATRP Polymerization Exhibiting Liquid-Crystalline Behavior
Source: MDPI journal article supplement (doi:10.3390/polym13132172), 2021-06-30
Supplement: s1 [file s1]

# Supplementary Information

## New Photoresponsive Poly(meth)acrylates Bearing Azobenzene Moieties Obtained via ATRP Polymerization Exhibiting Liquid-Crystalline Behavior

Piotr Cieciorński, Paweł W. Majewski and Elżbieta Megiel\*

Faculty of Chemistry, University of Warsaw, Pasteura 1 Str., 02-093 Warsaw, Poland

### Content:

**Figure S1.**  $^1\text{H}$  NMR (300 MHz,  $\text{CDCl}_3$ ) spectra of selected poly(AzoMA) (sample 10M).

**Figure S2.** MWD curves of the synthesised polymers obtained from SEC data. The curves description corresponds to the name of the samples given in Table 1 (the central part of the manuscript).

**Figure S3.** TGA curves recorded for the synthesised monomer AzoMA and its selected polymers obtained using CuBr/PMDETA/EBriB system with two molar ratios according to the description in Table 1 (time of polymerisation is given in the legend).

**Figure S4.** Photograph of the integrated system NMR tube and optical fibre for recording NMR spectra under illumination.

**Figure S5.**  $^1\text{H}$  NMR spectra of AzoMA recorded without illumination (a), after irradiation at 365 nm (photostationary state ( $\text{PSS}_{365}$ )) (b), after exposition subsequently at 460 nm (photostationary state ( $\text{PSS}_{455}$ )) (c).

**Figure S6.** DQF-gCOSY (Double Quantum Filtered Gradient – Correlation Spectroscopy) spectrum recorded for AzoMA.

**Figure S7.** Eyring-Polanyi plots obtained from UV-VIS measurements of thermal isomerisation  $Z \rightarrow E$  AzoMA (a) and poly(AzoMA) (sample 4M) (b). The dashed lines show the 95% confidence interval.

**Table S1.** The thermal isomerisation  $Z \rightarrow E$  parameters determined for monomer AzoMA and selected poly(AzoMA) (sample 4M) based on the Eyring-Polanyi equation extrapolated to 20°C. Errors margins for  $\Delta G^\ddagger$  values are given as 95% confidence interval (for n-2 degrees of freedom). Errors margins for  $k$  and  $t_{1/2}$  were propagated using an exact derivative method from the fitting data.

**Figure S8.** DSC thermogram for the solid poly(AzoMA) (sample 10M). The data were recorded in the second heating-cooling cycle after the vitrification of the sample.

**Table S2.** Peak positions and characteristic length scales derived from poly(AzoMA) diffractograms collected at room temperature.

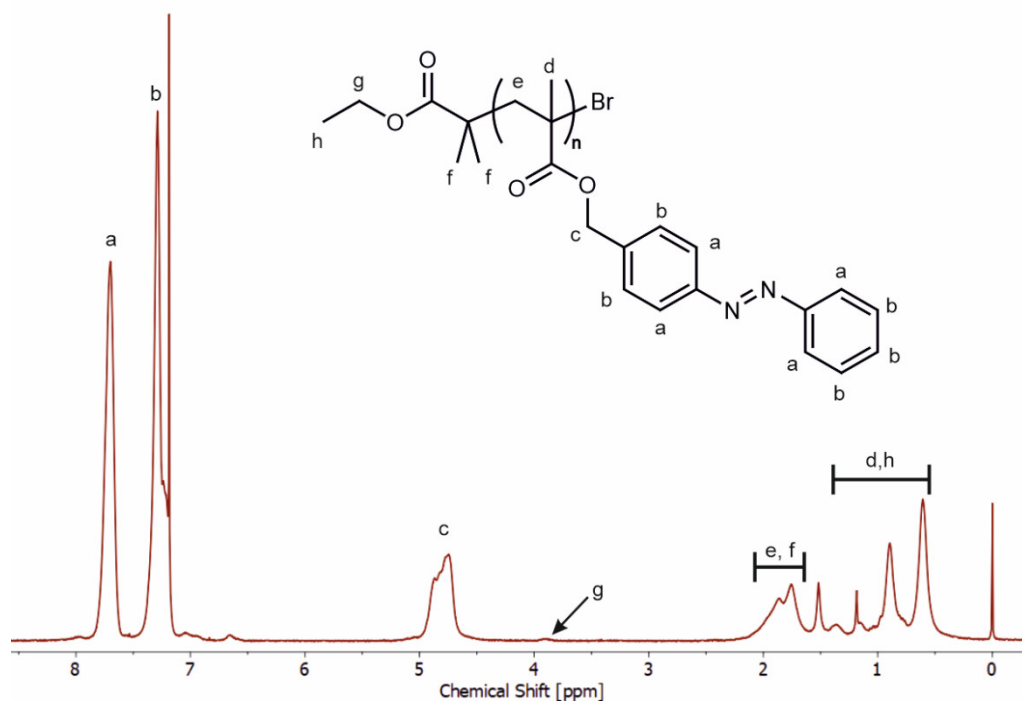

**Figure S1.**  $^1\text{H}$  NMR (300 MHz,  $\text{CDCl}_3$ ) spectra of selected poly(AzoMA) (sample 10M).

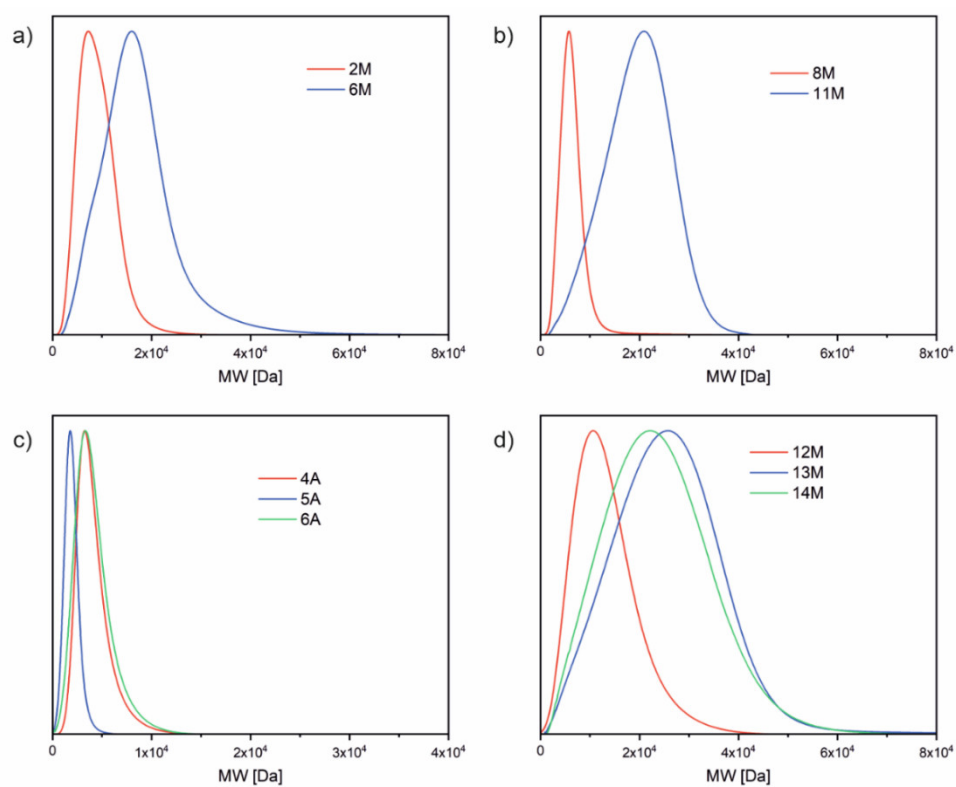

**Figure S2.** MWD curves of the synthesised polymers obtained from SEC data. The curves description corresponds to the name of the samples given in Table 1 (the central part of the manuscript).

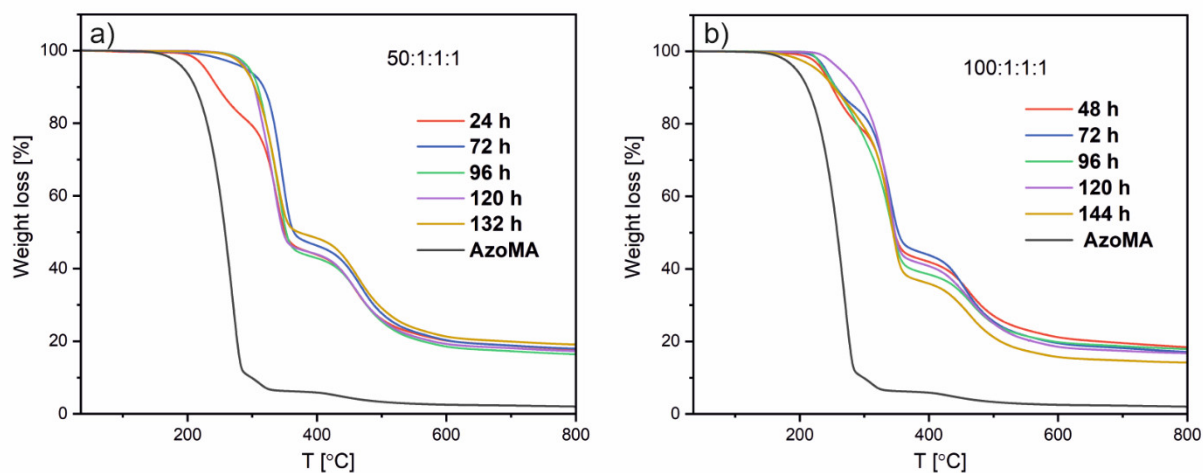

**Figure S3.** TGA curves recorded for the synthesised monomer AzoMA and its selected polymers obtained using CuBr/PMDETA/EBriB system with two molar ratios according to the description in Table 1 (time of polymerisation is given in the legend).

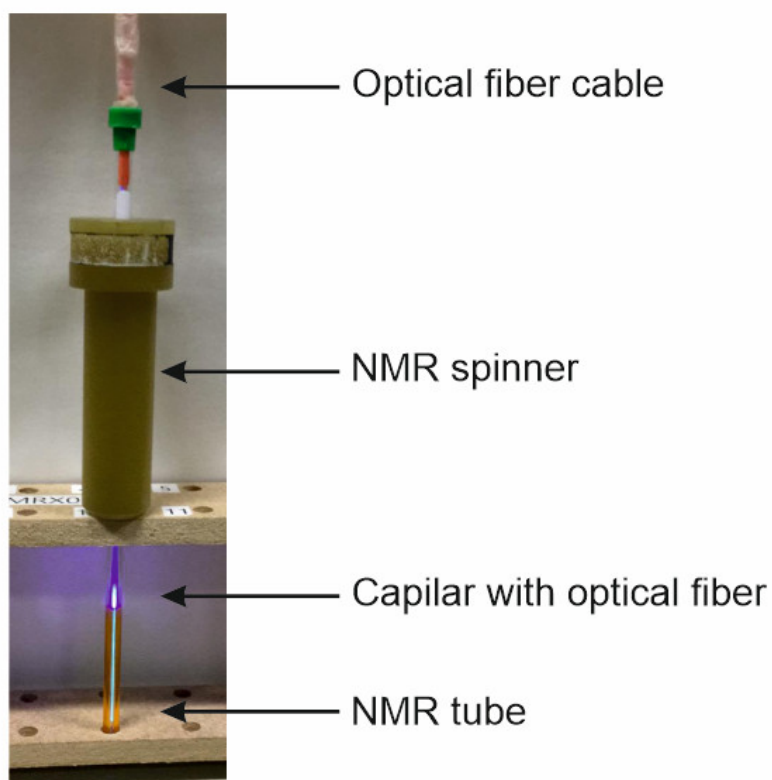

**Figure S4.** Photograph of the integrated system NMR tube and optical fibre for recording NMR spectra under illumination.

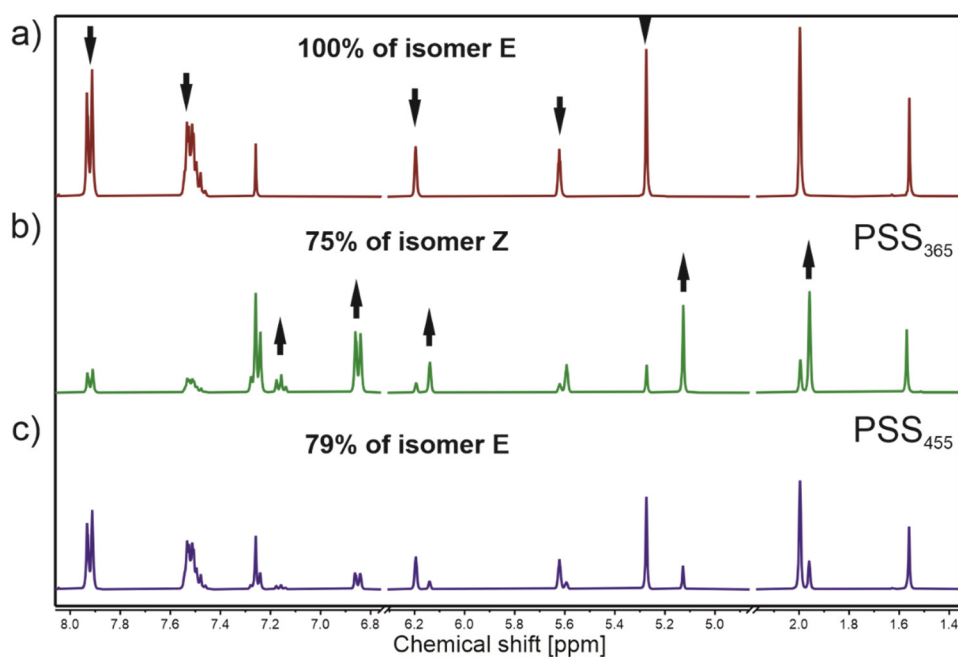

**Figure S5.**  $^1\text{H}$  NMR spectra of AzoMA recorded without illumination (a), after irradiation at 365 nm (photostationary state ( $\text{PSS}_{365}$ )) (b), after exposition subsequently at 460 nm (photostationary state ( $\text{PSS}_{455}$ )) (c).

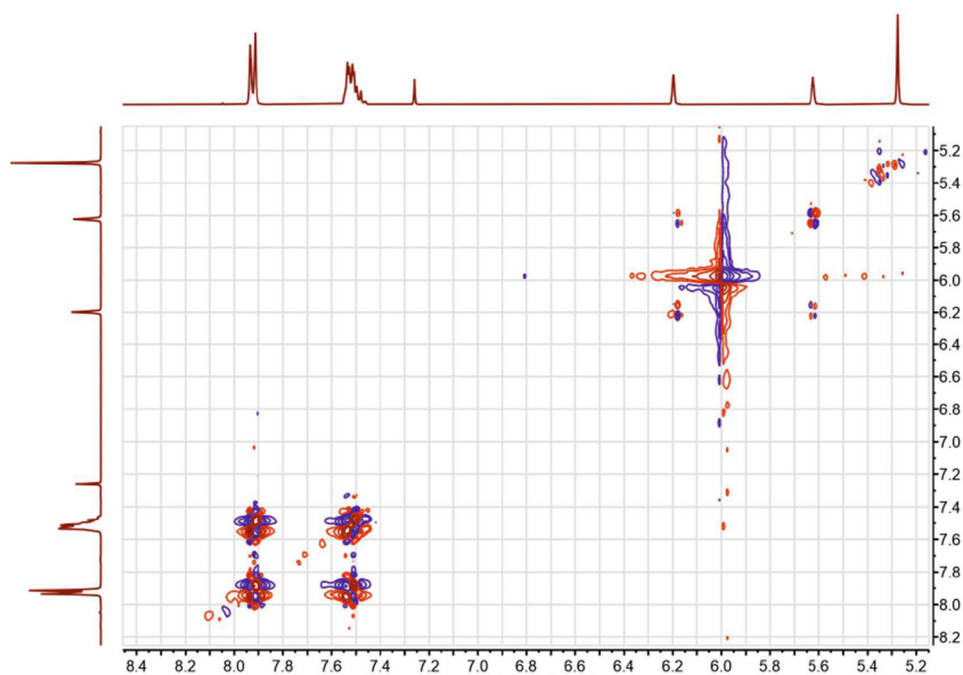

**Figure S6.** DQF-gCOSY (Double Quantum Filtered Gradient – Correlation Spectroscopy) spectrum recorded for AzoMA.

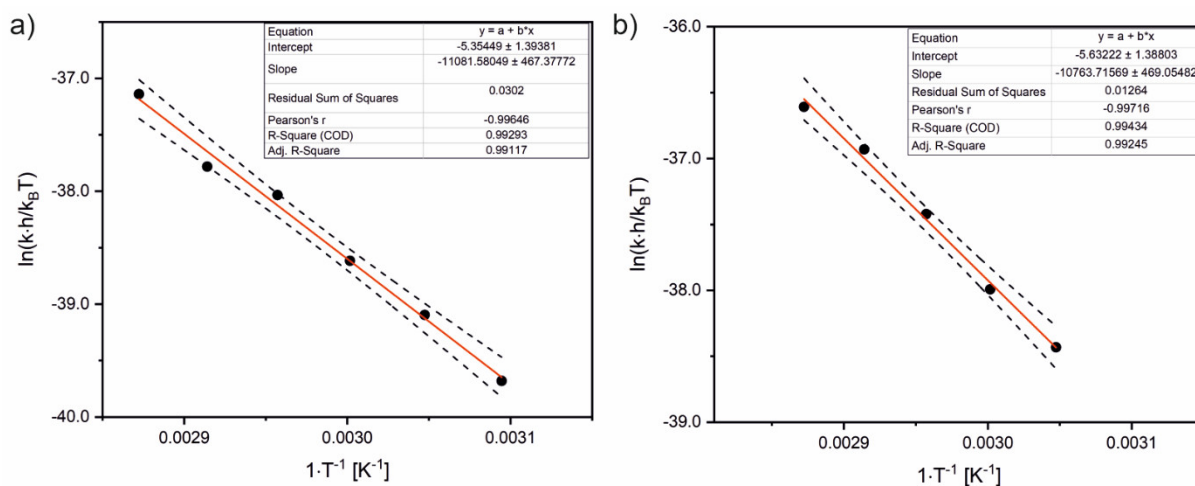

**Figure S7.** Eyring-Polanyi plots obtained from UV-VIS measurements of thermal isomerisation  $Z \rightarrow E$  AzoMA (a) and poly(AzoMA) (sample 4M) (b). The dashed lines show the 95% confidence interval.

**Table S1.** The thermal isomerisation  $Z \rightarrow E$  parameters determined for monomer AzoMA and selected poly(AzoMA) (sample 4M) based on the Eyring-Polanyi equation extrapolated to 20°C. Errors margins for  $\Delta G^\ddagger$  values are given as 95% confidence interval (for n-2 degrees of freedom). Errors margins for  $k$  and  $t_{1/2}$  were propagated using an exact derivative method from the fitting data.

|                         | $\Delta G^\ddagger$     | $k \cdot 10^{-6}$  | $t_{1/2}$ |
|-------------------------|-------------------------|--------------------|-----------|
|                         | [kJ·mol <sup>-1</sup> ] | [s <sup>-1</sup> ] | [days]    |
| <b>AzoMA</b>            | 105.2±1.4               | 1.09±0.09          | 7.3±0.6   |
| <b>Poly(AzoMA) / 4M</b> | 103.2±1.7               | 2.45±0.59          | 3.3±0.2   |

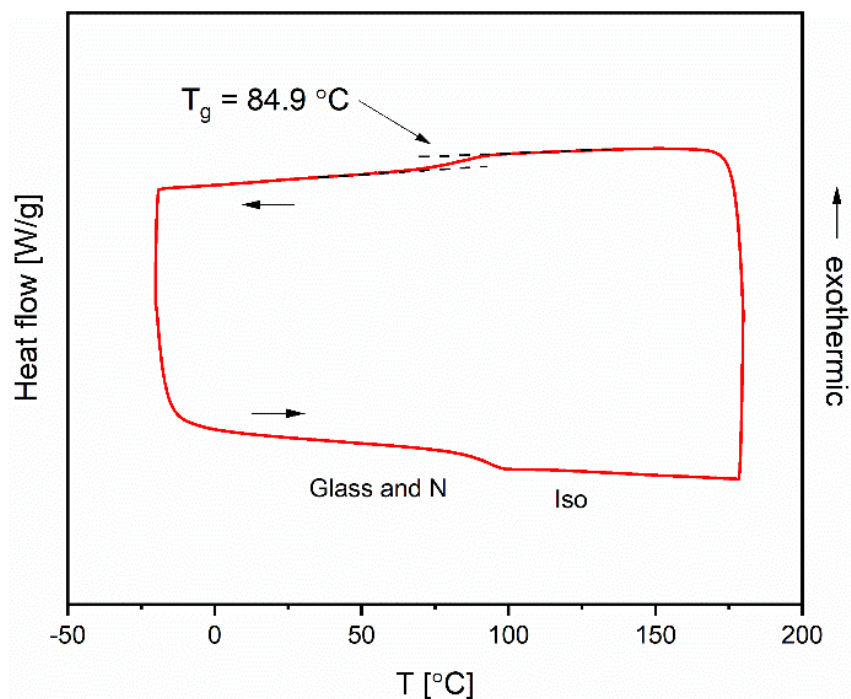

**Figure S8.** DSC thermogram for the solid poly(AzoMA) (sample 10M). The data was recorded in the second heating-cooling cycle after the vitrification of the sample.

**Table S2.** Peak positions and characteristic length scales derived from poly(AzoMA) diffractograms collected at room temperature.

|                          | Peak LC               | Peak W                |
|--------------------------|-----------------------|-----------------------|
|                          | $2\theta$ [°] (d [Å]) | $2\theta$ [°] (d [Å]) |
| <b>Poly(AzoMA) / 7M</b>  | 4.9 (18.1)            | 19.9 (4.5)            |
| <b>Poly(AzoMA) / 4M</b>  | 4.7 (18.9)            | 18.1 (4.9)            |
| <b>Poly(AzoMA) / 10M</b> | 4.6 (19.2)            | 18.2 (4.9)            |
